# Supplementary material
Source: PubMed Central journal article supplement (PMC2723679)
Supplement: 125_2009_1418_MOESM1_ESM.pdf [file 125_2009_1418_MOESM1_ESM.pdf]

**Electronic supplementary material**

**ESM Table 1** Baseline characteristics of patients who received human insulin or glargine, categorised according to daily dose received

| Variable                                                                        | Treatment | Dose (IU)      |                |                |                |                |                |                |
|---------------------------------------------------------------------------------|-----------|----------------|----------------|----------------|----------------|----------------|----------------|----------------|
|                                                                                 |           | ≤10            | 10–20          | 20–30          | 30–40          | 40–50          | 50–60          | >60            |
| No. of patients                                                                 | G         | 3,073 (12.9)   | 7,762 (32.5)   | 6,775 (28.4)   | 3,019 (12.7)   | 1,412 (5.9)    | 668 (2.8)      | 1,146 (4.8)    |
| (% of total population)                                                         | HI        | 10,592 (11.1)  | 11,846 (12.4)  | 14,590 (15.2)  | 14,735 (15.4)  | 14,664 (15.3)  | 8,300 (8.7)    | 21,077 (22.0)  |
| Age [years], mean (SD)                                                          | G         | 70.0 (13.0)    | 70.7 (11.5)    | 69.3 (11.3)    | 68.3 (10.9)    | 67.4 (11.2)    | 67.4 (11.8)    | 68.9 (11.6)    |
|                                                                                 | HI        | 68.2 (16.7)    | 71.0 (14.2)    | 71.7 (12.8)    | 71.1 (12.1)    | 69.9 (12.1)    | 68.9 (11.8)    | 67.1 (12.1)    |
| Sex (male/female)                                                               | G         | 42.8/57.2      | 42.8/57.2      | 44.5/55.5      | 45.7/54.3      | 45.3/54.7      | 49.6/50.4      | 46.9/53.1      |
|                                                                                 | HI        | 34.8/65.2      | 38.7/61.3      | 39.2/60.8      | 40.8/59.2      | 42.1/57.9      | 42.9/57.1      | 46.1/53.9      |
| Hospital stays during the 3 years before baseline, 0/1-2/>2                     | G         | 42.8/37.4/19.8 | 47.8/35.2/17.0 | 49.1/36.0/14.9 | 53.1/33.0/13.9 | 51.2/34.4/14.4 | 47.5/35.5/17.0 | 44.0/38.3/17.7 |
|                                                                                 | HI        | 39.1/37.9/23.0 | 34.6/39.9/25.5 | 33.2/41.2/25.6 | 33.2/43.1/23.7 | 35.0/42.5/22.5 | 36.4/41.7/21.9 | 36.5/41.6/21.9 |
| Duration of hospital stays during the 3 years before baseline [days], mean (SD) | G         | 17.0 (28.8)    | 13.9 (24.5)    | 13.1 (25.1)    | 12.5 (25.7)    | 11.8 (22.7)    | 14.2 (26.1)    | 15.0 (25.3)    |
|                                                                                 | HI        | 22.0 (37.4)    | 24.7 (37.5)    | 24.8 (37.3)    | 23.2 (34.4)    | 21.7 (32.2)    | 21.4 (33.6)    | 21.0 (36.1)    |
| Concomitant medication                                                          |           |                |                |                |                |                |                |                |
| Oral glucose-lowering agents                                                    | G         | 80.0           | 92.8           | 94.5           | 95.0           | 95.0           | 97.0           | 92.1           |
|                                                                                 | HI        | 42.0           | 71.4           | 78.6           | 81.8           | 83.9           | 85.8           | 86.0           |
| Biguanides (metformin)                                                          | G         | 48.9           | 61.5           | 66.8           | 70.6           | 72.0           | 74.6           | 69.8           |
|                                                                                 | HI        | 22.6           | 40.5           | 45.4           | 49.4           | 53.3           | 58.0           | 61.7           |
| Sulfonylureas                                                                   | G         | 67.5           | 80.1           | 82.6           | 83.4           | 82.2           | 83.4           | 80.1           |
|                                                                                 | HI        | 33.3           | 59.5           | 66.9           | 71.4           | 73.5           | 76.0           | 75.7           |
| α-Glucosidase inhibitors                                                        | G         | 14.5           | 17.1           | 19.2           | 18.5           | 16.8           | 19.9           | 13.3           |
|                                                                                 | HI        | 5.8            | 10.7           | 12.9           | 14.2           | 14.7           | 15.8           | 15.1           |
| Glitazones                                                                      | G         | 6.2            | 7.2            | 9.1            | 10.5           | 11.0           | 13.3           | 9.2            |
|                                                                                 | HI        | 1.6            | 3.4            | 4.0            | 4.7            | 5.3            | 6.1            | 7.1            |
| Others                                                                          | G         | 1.0            | 1.2            | 0.9            | 0.7            | 0.8            | 1.2            | 0.4            |
|                                                                                 | HI        | 0.7            | 0.8            | 1.1            | 0.7            | 0.8            | 0.6            | 0.7            |

| Variable              | Treatment | Dose (IU) |       |       |       |       |       |      |
|-----------------------|-----------|-----------|-------|-------|-------|-------|-------|------|
|                       |           | ≤10       | 10–20 | 20–30 | 30–40 | 40–50 | 50–60 | >60  |
| ACE inhibitors        | G         | 64.3      | 66.8  | 66.2  | 66.3  | 67.8  | 66.2  | 70.1 |
|                       | HI        | 53.7      | 62.6  | 65.5  | 65.9  | 66.8  | 65.9  | 69.1 |
| Anaesthetics          | G         | 1.1       | 1.1   | 1.3   | 1.4   | 0.9   | 0.9   | 1.0  |
|                       | HI        | 1.3       | 1.3   | 1.0   | 1.1   | 1.1   | 1.1   | 1.1  |
| Analgesics            | G         | 48.3      | 44.7  | 43.9  | 43.5  | 42.9  | 49.6  | 47.7 |
|                       | HI        | 47.9      | 47.4  | 46.2  | 45.1  | 44.8  | 42.9  | 46.1 |
| Antiallergics         | G         | 9.2       | 8.0   | 7.4   | 7.3   | 8.1   | 10.0  | 8.4  |
|                       | HI        | 9.9       | 8.9   | 8.1   | 7.6   | 7.7   | 7.7   | 8.0  |
| Antiarrhythmic agents | G         | 1.6       | 1.9   | 1.8   | 1.5   | 1.5   | 1.2   | 1.9  |
|                       | HI        | 1.8       | 2.1   | 2.0   | 2.1   | 2.0   | 1.9   | 2.3  |
| Antibiotics           | G         | 54.4      | 51.2  | 52.9  | 52.4  | 57.1  | 56.9  | 59.6 |
|                       | HI        | 52.0      | 52.7  | 50.2  | 50.2  | 50.6  | 48.2  | 52.6 |
| Antidotes             | G         | 0.10      | 0.05  | 0.06  | 0.03  | 0.00  | 0.15  | 0.09 |
|                       | HI        | 0.15      | 0.08  | 0.08  | 0.14  | 0.10  | 0.05  | 0.11 |
| Antiepileptics        | G         | 5.3       | 4.8   | 5.1   | 4.6   | 6.0   | 7.0   | 6.6  |
|                       | HI        | 5.3       | 5.7   | 5.5   | 5.1   | 5.1   | 4.8   | 5.6  |
| Antihypertensives     | G         | 8.9       | 10.2  | 10.1  | 9.9   | 9.6   | 8.4   | 11.8 |
|                       | HI        | 8.5       | 9.8   | 9.8   | 10.2  | 10.3  | 9.3   | 11.0 |
| Antirheumatic agents  | G         | 65.0      | 62.5  | 64.2  | 65.0  | 64.7  | 65.0  | 69.0 |
|                       | HI        | 59.5      | 59.5  | 57.8  | 57.3  | 58.4  | 57.6  | 60.3 |
| Antitussives          | G         | 40.8      | 37.4  | 37.2  | 38.8  | 37.9  | 42.1  | 41.2 |
|                       | HI        | 39.3      | 35.5  | 34.4  | 34.1  | 34.2  | 34.1  | 35.9 |
| Beta blockers         | G         | 43.2      | 43.3  | 45.0  | 45.7  | 46.0  | 44.8  | 47.1 |
|                       | HI        | 36.2      | 41.6  | 42.3  | 43.6  | 46.4  | 45.1  | 49.7 |
| Bronchodilators       | G         | 18.1      | 15.5  | 16.7  | 17.7  | 19.6  | 19.6  | 20.2 |
|                       | HI        | 18.3      | 18.2  | 17.2  | 17.6  | 18.0  | 17.3  | 19.2 |
| Calcium antagonists   | G         | 33.7      | 33.5  | 35.0  | 33.4  | 31.2  | 32.2  | 33.0 |
|                       | HI        | 30.2      | 33.1  | 35.3  | 35.9  | 35.5  | 34.6  | 35.3 |

| Variable                                     | Treatment | Dose (IU) |       |       |       |       |       |      |
|----------------------------------------------|-----------|-----------|-------|-------|-------|-------|-------|------|
|                                              |           | ≤10       | 10–20 | 20–30 | 30–40 | 40–50 | 50–60 | >60  |
| Corticosteroids                              | G         | 14.4      | 11.8  | 10.5  | 11.5  | 13.4  | 14.1  | 15.9 |
|                                              | HI        | 16.2      | 15.2  | 13.9  | 13.9  | 13.4  | 13.1  | 14.0 |
| Dermatologicals                              | G         | 48.7      | 46.1  | 44.9  | 44.1  | 46.3  | 47.2  | 47.0 |
|                                              | HI        | 47.3      | 46.8  | 45.0  | 42.7  | 43.4  | 42.0  | 44.7 |
| Diuretics                                    | G         | 47.0      | 46.1  | 45.1  | 45.8  | 45.5  | 45.7  | 47.9 |
|                                              | HI        | 45.0      | 51.4  | 52.5  | 51.8  | 52.0  | 50.8  | 52.7 |
| Antigout agents                              | G         | 17.1      | 16.2  | 17.9  | 17.8  | 17.5  | 19.5  | 20.6 |
|                                              | HI        | 15.1      | 17.0  | 17.0  | 16.4  | 17.6  | 17.1  | 19.5 |
| Gynaecologicals                              | G         | 5.9       | 5.5   | 5.3   | 5.5   | 6.1   | 7.2   | 5.8  |
|                                              | HI        | 10.2      | 6.5   | 5.6   | 5.5   | 6.2   | 6.0   | 6.6  |
| Haematologicals                              | G         | 50.3      | 48.1  | 47.3  | 47.3  | 46.5  | 44.6  | 51.5 |
|                                              | HI        | 49.7      | 53.5  | 54.0  | 52.5  | 52.2  | 50.2  | 51.9 |
| Immune-modifying agents                      | G         | 2.0       | 1.4   | 1.1   | 1.1   | 1.5   | 0.6   | 1.8  |
|                                              | HI        | 2.4       | 1.9   | 1.8   | 1.8   | 1.8   | 1.6   | 1.8  |
| Cardiac agents                               | G         | 27.6      | 25.1  | 25.7  | 24.4  | 22.8  | 24.1  | 24.0 |
|                                              | HI        | 26.1      | 28.6  | 28.8  | 29.1  | 28.6  | 28.9  | 29.7 |
| Agents for coronary heart disease            | G         | 28.6      | 26.9  | 26.6  | 25.8  | 24.1  | 25.3  | 26.7 |
|                                              | HI        | 25.4      | 29.3  | 30.7  | 30.0  | 30.0  | 27.9  | 28.0 |
| Agents for liver disease                     | G         | 2.2       | 2.1   | 2.3   | 2.4   | 2.6   | 3.4   | 2.5  |
|                                              | HI        | 2.5       | 2.4   | 2.3   | 2.6   | 2.4   | 2.3   | 2.6  |
| Lipid-lowering agents                        | G         | 29.7      | 30.9  | 31.4  | 32.6  | 32.7  | 33.4  | 36.7 |
|                                              | HI        | 20.3      | 25.8  | 26.9  | 28.1  | 29.7  | 30.6  | 33.7 |
| Gastrointestinal agents                      | G         | 51.9      | 47.5  | 47.5  | 45.3  | 49.2  | 50.2  | 51.1 |
|                                              | HI        | 54.1      | 52.6  | 51.7  | 49.6  | 50.3  | 47.8  | 51.1 |
| Agents for diseases of the parathyroid gland | G         | 2.7       | 2.1   | 1.8   | 1.9   | 1.6   | 2.5   | 1.8  |
|                                              | HI        | 3.0       | 2.5   | 2.4   | 2.0   | 2.1   | 1.7   | 1.8  |
| Parasympathomimetics                         | G         | 0.5       | 0.2   | 0.2   | 0.4   | 0.6   | 0.2   | 0.5  |
|                                              | HI        | 0.4       | 0.4   | 0.3   | 0.3   | 0.2   | 0.40  | 0.3  |

| Variable                                                  | Treatment | Dose (IU) |       |       |       |       |       |      |
|-----------------------------------------------------------|-----------|-----------|-------|-------|-------|-------|-------|------|
|                                                           |           | ≤10       | 10–20 | 20–30 | 30–40 | 40–50 | 50–60 | >60  |
| Anti-Parkinson agents                                     | G         | 4.7       | 3.5   | 3.6   | 3.9   | 4.1   | 4.2   | 6.0  |
|                                                           | HI        | 5.4       | 4.9   | 4.9   | 4.5   | 4.0   | 3.5   | 3.8  |
| Psychopharmacologicals                                    | G         | 37.7      | 33.2  | 32.8  | 33.8  | 34.6  | 35.5  | 35.4 |
|                                                           | HI        | 40.5      | 39.4  | 37.5  | 36.2  | 35.0  | 33.7  | 34.4 |
| Agents for diseases of the thyroid gland                  | G         | 15.8      | 15.0  | 16.1  | 15.7  | 15.7  | 14.7  | 16.6 |
|                                                           | HI        | 16.8      | 15.9  | 15.1  | 14.7  | 14.5  | 15.0  | 14.5 |
| Sex hormones                                              | G         | 10.5      | 10.1  | 10.4  | 10.0  | 9.6   | 9.6   | 8.8  |
|                                                           | HI        | 12.8      | 9.9   | 9.1   | 8.6   | 9.2   | 9.3   | 9.8  |
| Urologicals                                               | G         | 15.9      | 14.3  | 14.5  | 13.9  | 14.3  | 14.2  | 15.0 |
|                                                           | HI        | 13.3      | 13.5  | 13.6  | 13.6  | 14.0  | 12.8  | 13.3 |
| Vitamins                                                  | G         | 13.3      | 12.9  | 12.5  | 12.2  | 13.2  | 11.2  | 9.8  |
|                                                           | HI        | 11.7      | 12.8  | 12.8  | 13.1  | 12.1  | 12.3  | 12.4 |
| Cytostatic agents (prescribed for non-malignant diseases) | G         | 1.6       | 1.4   | 1.7   | 1.4   | 1.5   | 1.8   | 1.6  |
|                                                           | HI        | 1.6       | 1.6   | 1.6   | 1.7   | 1.4   | 1.8   | 1.8  |

Numbers are percentages (if not specified otherwise)

<sup>a</sup>*F* test for continuous variables,  $\chi^2$  test for proportions

G, glargine; HI, human insulin
