# Supplementary material
Source: PubMed Central journal article supplement (PMC2723679)
Supplement: 125_2009_1418_MOESM2_ESM.pdf [file 125_2009_1418_MOESM2_ESM.pdf]

## Electronic supplementary material

**ESM Table 2** Results of the final Cox regression model for malignant neoplasms (reference group: human insulin) based on data for 127,031 patients

| Covariate                                                 | Regression coefficient estimate | Standard error | <i>p</i> value |
|-----------------------------------------------------------|---------------------------------|----------------|----------------|
| Aspart                                                    | -0.0141                         | 0.0999         | 0.89           |
| Lispro                                                    | -0.0121                         | 0.1013         | 0.91           |
| Glargine                                                  | 0.0421                          | 0.0466         | 0.37           |
| Female                                                    | 0.2168                          | 0.1995         | 0.28           |
| Age (years)                                               | 0.0373                          | 0.0023         | <0.0001        |
| Mean daily dose (IU)                                      | 0.0039                          | 0.0014         | 0.005          |
| Bavaria                                                   | -0.13                           | 0.0693         | 0.06           |
| Berlin                                                    | -0.0339                         | 0.0585         | 0.56           |
| Brandenburg                                               | 0.0136                          | 0.0538         | 0.80           |
| Bremen                                                    | -0.0027                         | 0.1152         | 0.98           |
| Hamburg                                                   | -0.1188                         | 0.0959         | 0.22           |
| Hesse                                                     | -0.0942                         | 0.0516         | 0.07           |
| Lower Saxony                                              | -0.1754                         | 0.0711         | 0.01           |
| Mecklenburg-Western Pomerania                             | -0.0478                         | 0.0593         | 0.42           |
| Rhineland                                                 | -0.0011                         | 0.0659         | 0.99           |
| Saarland                                                  | 0.0555                          | 0.0797         | 0.49           |
| Saxony-Anhalt                                             | 0.1155                          | 0.0628         | 0.07           |
| Schleswig-Holstein                                        | -0.1157                         | 0.0672         | 0.09           |
| Oral glucose-lowering agents                              | -0.1451                         | 0.0355         | <0.0001        |
| Gastrointestinal agents                                   | 0.1893                          | 0.0294         | <0.0001        |
| ACE inhibitors                                            | -0.1204                         | 0.0300         | <0.0001        |
| Antiarrhythmic agents                                     | 0.2389                          | 0.0926         | 0.01           |
| Corticosteroids                                           | 0.1530                          | 0.0423         | 0.0003         |
| Agents for diseases of the parathyroid gland              | 0.3055                          | 0.0945         | 0.001          |
| Cytostatic agents (prescribed for non-malignant diseases) | 0.8641                          | 0.0731         | <0.0001        |
| Interaction terms                                         |                                 |                |                |
| Female×age                                                | -0.0096                         | 0.0027         | 0.0004         |
| Female×dose                                               | 0.0011                          | 0.0003         | 0.002          |
| Age×dose                                                  | 0.0001                          | 0.00002        | <0.0001        |
| Aspart×dose                                               | 0.0010                          | 0.0007         | 0.14           |
| Lispro×dose                                               | -0.0002                         | 0.0013         | 0.88           |
| Glargine×dose                                             | 0.0045                          | 0.0005         | <0.0001        |
