# Supplementary material
Source: PubMed Central journal article supplement (PMC2723679)
Supplement: 125_2009_1418_MOESM3_ESM.pdf [file 125_2009_1418_MOESM3_ESM.pdf]

## Electronic supplementary material

**ESM Table 3** Results of the final Cox regression model for all-cause mortality (reference group: human insulin) based on data for 127,031 patients

| Covariate                                                 | Regression coefficient estimate | Standard error | <i>p</i> value |
|-----------------------------------------------------------|---------------------------------|----------------|----------------|
| Aspart                                                    | -0.0958                         | 0.1008         | 0.34           |
| Lispro                                                    | -0.0374                         | 0.0792         | 0.64           |
| Glargine                                                  | -1.4037                         | 0.1957         | <0.0001        |
| Female                                                    | -1.8667                         | 0.1281         | <0.0001        |
| Age (years)                                               | 0.0426                          | 0.0017         | <0.0001        |
| Number of hospital stays                                  | 0.0401                          | 0.0023         | <0.0001        |
| Duration of hospital stays (days)                         | 0.0026                          | 0.0001         | <0.0001        |
| Mean daily dose (IU)                                      | -0.0256                         | 0.0023         | <0.0001        |
| Bavaria                                                   | -0.1123                         | 0.0374         | 0.003          |
| Berlin                                                    | 0.0286                          | 0.0300         | 0.34           |
| Brandenburg                                               | 0.0594                          | 0.0287         | 0.04           |
| Bremen                                                    | 0.1456                          | 0.0583         | 0.01           |
| Hamburg                                                   | 0.1193                          | 0.0479         | 0.01           |
| Hesse                                                     | 0.0268                          | 0.0265         | 0.31           |
| Mecklenburg-Western Pomerania                             | 0.0400                          | 0.0315         | 0.20           |
| Lower Saxony                                              | -0.0366                         | 0.0367         | 0.32           |
| Rhineland                                                 | 0.0178                          | 0.0370         | 0.63           |
| Saarland                                                  | -0.0849                         | 0.0453         | 0.06           |
| Saxony-Anhalt                                             | -0.0117                         | 0.0356         | 0.74           |
| Schleswig-Holstein                                        | -0.0139                         | 0.0341         | 0.68           |
| Antirheumatic agents                                      | -0.2404                         | 0.0163         | <0.0001        |
| Beta blockers                                             | -0.0611                         | 0.0164         | 0.0002         |
| Bronchodilators                                           | 0.0962                          | 0.0200         | <0.0001        |
| Corticosteroids                                           | 0.1819                          | 0.0222         | <0.0001        |
| Dermatologicals                                           | 0.1696                          | 0.0160         | <0.0001        |
| Diuretics                                                 | 0.4148                          | 0.0179         | <0.0001        |
| Antigout agents                                           | 0.0716                          | 0.0194         | 0.0002         |
| Gynaecologicals                                           | -0.1154                         | 0.0444         | 0.009          |
| Haematologicals                                           | 0.1916                          | 0.0167         | <0.0001        |
| Cardiac agents                                            | 0.1093                          | 0.0163         | <0.0001        |
| Lipid-lowering agents                                     | -0.2674                         | 0.0198         | <0.0001        |
| Gastrointestinal agents                                   | 0.2203                          | 0.0166         | <0.0001        |
| Anti-Parkinson agents                                     | 0.1214                          | 0.0308         | <0.0001        |
| Psychopharmacologicals                                    | 0.2158                          | 0.0162         | <0.0001        |
| Sex hormones                                              | -0.3463                         | 0.0382         | <0.0001        |
| Urologicals                                               | -0.1058                         | 0.0219         | <0.0001        |
| Cytostatic agents (prescribed for non-malignant diseases) | 0.1464                          | 0.0512         | 0.004          |
| Interaction terms                                         |                                 |                |                |
| Female×age                                                | 0.0190                          | 0.0017         | <0.0001        |
| Age×dose                                                  | 0.0004                          | 0.0000         | <0.0001        |
| Aspart×dose                                               | -0.0004                         | 0.0025         | 0.89           |
| Lispro×dose                                               | -0.0005                         | 0.0019         | 0.77           |
| Glargine×dose                                             | 0.0114                          | 0.0014         | <0.0001        |
| Glargine×age                                              | 0.0146                          | 0.0024         | <0.0001        |
